# Supplementary material for: Protein profiling of extracellular vesicles from the cerebrospinal fluid of patients with multiple sclerosis
Source: Research Square preprint supplement (doi:10.21203/rs.3.rs-5954841/v1), 2025-02-07
Supplement: Supplementary file 1 [file ee0b9ad2eef2ab37b378d39c.xlsx]

## Sheet: Supplementary table 1
Supplementary table 1. Discovery_CSF_valid value
Columns	Log2(intensity; Median)	Valid values
OND-1	17.0126	635
OND-3	17.4594	570
OND-4	16.8374	598
OND-5	17.0091	601
OND-6	17.6888	623
OND-7	16.4405	559
OND-8	17.1127	606
OND-9	16.8451	604
OND-10	16.6901	561
MS-2	16.8198	593
MS-3	16.9363	632
MS-4	17.0432	622
MS-5	16.8896	567
MS-6	16.7155	631
MS-7	17.2194	659
MS-8	17.2034	621
MS-9	17.3334	636
MS-10	16.7057	582

## Sheet: Supplementary table 2
Supplementary table 2. Discovery_CSF-EV_valid value
Columns	Log2 (intensity; Median)	Valid values
OND-1	17.241	3233
OND-2	17.366	2944
OND-3	17.3279	2916
OND-4	17.4555	3445
OND-5	17.1058	2958
OND-6	17.5035	3538
OND-7	17.1926	3179
OND-8	17.2052	3368
OND-9	17.1471	3353
OND-10	17.6376	3029
MS-1	17.3793	3275
MS-2	17.1736	3509
MS-3	17.0575	3312
MS-4	17.425	2905
MS-5	17.2867	3424
MS-6	17.331	3187
MS-7	17.5612	3384
MS-8	17.4395	3198
MS-9	17.1777	3256
MS-10	17.0036	3436

## Sheet: Supplementary table 3
Supplementary table 3. Assessment of the degree of purity of EV preparation
Category	Transmembrane (or GPI‐anchored) proteins associated with plasma membrane and/or endosomes
	For all Evs
	Protein.Ids	Protein.Names	Gene symbol	log2 fold change(CSF-EV/CSF)
1a	P21926	CD9_HUMAN	CD9	ND
	P08962	CD63_HUMAN	CD63	ND
	P60033	CD81_HUMAN	CD81	ND
	Q08722	CD47_HUMAN	CD47	ND
1b	P11279	LAMP1_HUMAN	LAMP1	1.82465509634981
	O14672	ADA10_HUMAN	ADAM10	6.76766070510431
1c	P35052	GPC1_HUMAN	GPC1	2.87357384064903
Category	Cytosolic proteins recovered in Evs
	For all Evs
	Protein.Ids	Protein.Names	Gene symbol	log2 fold change(CSF-EV/CSF)
2a	Q99816	TS101_HUMAN	TSG101	ND
	Q8WUM4	PDC6I_HUMAN	PDCD6IP	2.47069235237666
2b	P54652;P11142	HSP7C_HUMAN	HSPA8	8.42293236915625
Category	Major components of non-EV co-isolated structures
	For non-EV (contaminant)
	Protein.Ids	Protein.Names	Gene symbol	log2 fold change(CSF-EV/CSF)
3a	P02647	APOA1_HUMAN	APOA1	-0.509304953660078
3b	P0DOX2;P01877;P01876	IGHA1_HUMAN	IGHA1	-2.1963568409668
	P01834;P0DOX7	IGKC_HUMAN	IGKC	-5.17971114431353
ND: Detected only in CSF-EV, not in CSF.

## Sheet: Supplementary table 4
Supplementary table 4. Dicovery_CSF_MS/OND
Protein.Ids	Protein.Names	Gene symbol	Fold change (MS/OND)	p-value (OND_MS)
A0A087WSZ0	KVD08_HUMAN	IGKV1D-8	3.61717	0.027474
A0A075B6I4	LVX54_HUMAN	IGLV10-54	3.06223	0.0152073
P36980	FHR2_HUMAN	CFHR2	3.04965	0.0324815
A2NJV5;A0A075B6S2	KV229_HUMAN	IGKV2-29	2.6941	0.0167038
P01742	HV169_HUMAN	IGHV1-69	2.68721	0.0224816
P04432;A0A0C4DH73;A0A0C4DH72;P01597;P01611	KV139_HUMAN;KVD39_HUMAN	IGKV1-39;IGKV1D-39	2.6288	0.0413571
P01780	HV307_HUMAN	IGHV3-7	2.61445	0.00336384
P01766	HV313_HUMAN	IGHV3-13	2.53477	0.0117735
A0A075B6S6;P06310	KV230_HUMAN	IGKV2-30	2.452	0.00782519
P01825;P06331;P0DP06;P01824;P0DP08;A0A0C4DH41	HV434_HUMAN	IGHV4-34	2.30673	0.00290491
Q9NZK5	ADA2_HUMAN	ADA2	2.12852	0.0130913
P04433;A0A0A0MRZ8	KV311_HUMAN;KVD11_HUMAN	IGKV3-11;IGKV3D-11	2.0801	0.0151151
A0A0C4DH67;A0A0C4DH69;A0A075B6S5	KV127_HUMAN	IGKV1-27	2.06682	0.015331
A0A0C4DH35	HV335_HUMAN	IGHV3-35	2.05822	0.0397614
P01700	LV147_HUMAN	IGLV1-47	2.00799	0.00238717
A0A075B6P5;P01615	KV228_HUMAN;KVD28_HUMAN	IGKV2-28;IGKV2D-28	1.98808	0.0276007
A0A0A0MS15;A0A0B4J1V6	HV349_HUMAN	IGHV3-49	1.96246	0.00166043
P01721	LV657_HUMAN	IGLV6-57	1.95723	0.0406278
P36222	CH3L1_HUMAN	CHI3L1	1.93115	0.0419935
P06312	KV401_HUMAN	IGKV4-1	1.89631	0.00338651
P49257	LMAN1_HUMAN	LMAN1	1.88759	0.0104096
A0A0B4J1X8	HV343_HUMAN	IGHV3-43	1.76422	0.0367812
P01599	KV117_HUMAN	IGKV1-17	1.70816	0.00127499
A0A0J9YX35	HV64D_HUMAN	IGHV3-64D	1.68684	0.0197879
A0A0B4J1U7	HV601_HUMAN	IGHV6-1	1.66693	0.00229194
P10451	OSTP_HUMAN	SPP1	1.64387	0.0141046
P0DP02;P01772;P0DP03;P01768	HV330_HUMAN;HVC05_HUMAN	IGHV3-30;IGHV3-30-5	1.63479	0.00224184
A0A075B6I9	LV746_HUMAN	IGLV7-46	1.62565	0.017948
Q9Y279	VSIG4_HUMAN	VSIG4	1.58872	0.0117343
A0A0C4DH38;A0A0J9YXX1	HV5X1_HUMAN	IGHV5-10-1	1.57207	0.021687
A0M8Q6	IGLC7_HUMAN	IGLC7	1.54701	0.0375105
Q8IUC8	GLT13_HUMAN	GALNT13	1.51698	0.0359159
P01619	KV320_HUMAN	IGKV3-20	1.51103	0.0180545
P57087	JAM2_HUMAN	JAM2	0.630642	0.0172295
Q6FHJ7	SFRP4_HUMAN	SFRP4	0.554441	0.0239555

## Sheet: Supplementary table 5
Supplementary table 5. Dicovery_CSF-EV_MS/OND
Protein.Ids	Protein.Names	Gene symbol	Fold change (MS/OND)	p-value (OND_MS)
P14151	LYAM1_HUMAN	SELL	4.04125	0.0271806
A0A075B6P5;P01615	KV228_HUMAN;KVD28_HUMAN	IGKV2-28;IGKV2D-28	3.8337	0.0239694
P11836	CD20_HUMAN	MS4A1	3.48408	0.00202325
Q86WV1	SKAP1_HUMAN	SKAP1	3.14082	0.0134229
P04433;A0A0A0MRZ8	KV311_HUMAN;KVD11_HUMAN	IGKV3-11;IGKV3D-11	2.98924	0.033945
P28907	CD38_HUMAN	CD38	2.9572	0.00217102
P26010	ITB7_HUMAN	ITGB7	2.91735	0.00166521
P01825;P06331;P0DP06;P01824;P0DP08;A0A0C4DH41	HV434_HUMAN;HV439_HUMAN;HV459_HUMAN;HV461_HUMAN;HVD34_HUMAN;HVD82_HUMAN	IGHV4-30-4;IGHV4-34;IGHV4-38-2;IGHV4-39;IGHV4-59;IGHV4-61	2.87329	0.00827517
Q13291	SLAF1_HUMAN	SLAMF1	2.74933	0.0130695
Q14761	PTCA_HUMAN	PTPRCAP	2.74658	0.0146574
Q96F15	GIMA5_HUMAN	GIMAP5	2.67932	0.0443169
Q86VZ1	P2RY8_HUMAN	P2RY8	2.62545	0.00441308
P01700	LV147_HUMAN	IGLV1-47	2.61532	0.0277579
P14317	HCLS1_HUMAN	HCLS1	2.58936	0.00181843
A6QL63	BTBDB_HUMAN	BTBD11	2.57886	1.80247e-05
Q99795	GPA33_HUMAN	GPA33	2.55035	0.0420233
Q13094	LCP2_HUMAN	LCP2	2.54993	0.0282588
P07766	CD3E_HUMAN	CD3E	2.52338	0.00750666
Q9P1W8	SIRPG_HUMAN	SIRPG	2.51715	0.0364669
P09693	CD3G_HUMAN	CD3G	2.50597	0.00529282
P33241	LSP1_HUMAN	LSP1	2.47866	0.0112892
P49682	CXCR3_HUMAN	CXCR3	2.42916	0.0176989
P06127	CD5_HUMAN	CD5	2.40003	0.0114029
P20963	CD3Z_HUMAN	CD247	2.36276	0.0107474
P04234	CD3D_HUMAN	CD3D	2.34265	0.0076381
P01850;P0DSE2;A0A5B9	TRBR1_HUMAN	TRB	2.30735	0.0104689
P06729	CD2_HUMAN	CD2	2.28294	0.0160189
Q9Y3P8	SIT1_HUMAN	SIT1	2.26068	0.0220862
P09326	CD48_HUMAN	CD48	2.25177	0.00796825
Q7LDG7	GRP2_HUMAN	RASGRP2	2.24011	0.0119993
P01848;P0DSE1	TRAC_HUMAN	TRAC	2.23758	0.010566
P06239	LCK_HUMAN	LCK	2.20799	0.0169928
Q8IV04	TB10C_HUMAN	TBC1D10C	2.20761	0.0237265
Q9UIB8	SLAF5_HUMAN	CD84	2.203	0.00919442
P16389;Q09470;P22001	KCNA3_HUMAN	KCNA3	2.19141	0.0211869
P20701	ITAL_HUMAN	ITGAL	2.17229	0.00114412
P13612	ITA4_HUMAN	ITGA4	2.16738	0.00238218
Q7Z6I6	RHG30_HUMAN	ARHGAP30	2.15347	0.00317137
O15117	FYB1_HUMAN	FYB1	2.1264	0.020221
Q86YV0	RASL3_HUMAN	RASAL3	2.12416	0.00254707
Q8IU68	TMC8_HUMAN	TMC8	2.11557	0.0326871
P29728	OAS2_HUMAN	OAS2	2.10551	0.0158292
Q96DU3	SLAF6_HUMAN	SLAMF6	2.09257	0.00854685
O43586	PPIP1_HUMAN	PSTPIP1	2.09135	0.00243359
P15153	RAC2_HUMAN	RAC2	2.06694	0.0182442
P10321	HLAC_HUMAN	HLA-C	2.06632	0.0282983
P01730	CD4_HUMAN	CD4	2.02532	0.0226463
P10747	CD28_HUMAN	CD28	1.9978	0.0155461
O60496	DOK2_HUMAN	DOK2	1.99596	0.0376213
P13598	ICAM2_HUMAN	ICAM2	1.98941	0.0294381
P32942	ICAM3_HUMAN	ICAM3	1.98485	0.0166304
P16150	LEUK_HUMAN	SPN	1.97299	0.00186176
Q92835	SHIP1_HUMAN	INPP5D	1.96195	0.0181451
Q9H4E7	DEFI6_HUMAN	DEF6	1.94775	0.0111007
Q13576	IQGA2_HUMAN	IQGAP2	1.93751	0.00595918
Q8WYJ6	SEPT1_HUMAN	SEPTIN1	1.93464	0.00565483
P01780	HV307_HUMAN	IGHV3-7	1.92885	0.0478743
B0I1T2	MYO1G_HUMAN	MYO1G	1.92799	0.00587535
Q8NF50	DOCK8_HUMAN	DOCK8	1.92309	0.00321054
Q96BY6	DOC10_HUMAN	DOCK10	1.92275	0.000689542
P11049	CD37_HUMAN	CD37	1.86699	0.0016928
P08575	PTPRC_HUMAN	PTPRC	1.84367	0.00474829
O00398	P2Y10_HUMAN	P2RY10	1.84137	0.0375279
P42768	WASP_HUMAN	WAS	1.8369	0.0447946
Q92608	DOCK2_HUMAN	DOCK2	1.83235	0.00389921
O94804	STK10_HUMAN	STK10	1.82615	0.000213715
P31146	COR1A_HUMAN	CORO1A	1.82218	0.0376443
Q6UWD8	CP054_HUMAN	C16orf54	1.81032	0.00988387
P52566	GDIR2_HUMAN	ARHGDIB	1.80742	0.00974865
Q9NUV9	GIMA4_HUMAN	GIMAP4	1.80688	0.00342545
Q8N8S7	ENAH_HUMAN	ENAH	1.78021	0.0158467
Q9UI08	EVL_HUMAN	EVL	1.77315	0.0226927
Q92619	HMHA1_HUMAN	ARHGAP45	1.74947	0.0380214
Q13303;Q14722	KCAB2_HUMAN	KCNAB2	1.74862	0.00895036
P19397	CD53_HUMAN	CD53	1.71704	0.00052444
O95466	FMNL1_HUMAN	FMNL1	1.71702	0.00684555
P55160	NCKPL_HUMAN	NCKAP1L	1.694	0.00214416
P01732	CD8A_HUMAN	CD8A	1.6893	0.0234464
Q96RU3	FNBP1_HUMAN	FNBP1	1.68787	0.00561784
P15509	CSF2R_HUMAN	CSF2RA	1.67929	0.0456685
Q5JSL3	DOC11_HUMAN	DOCK11	1.6605	0.00961637
O43566	RGS14_HUMAN	RGS14	1.65797	0.0440578
P53582	MAP11_HUMAN	METAP1	1.657	0.00744232
Q8IWB7	WDFY1_HUMAN	WDFY1	1.64836	0.00652828
Q6PCB8	EMB_HUMAN	EMB	1.63619	0.0273246
Q9NWQ8	PHAG1_HUMAN	PAG1	1.62573	0.00444463
Q9HBH0	RHOF_HUMAN	RHOF	1.62355	0.00393633
P48960	CD97_HUMAN	CD97	1.60681	0.0133699
P20702	ITAX_HUMAN	ITGAX	1.60414	0.0444858
P24723	KPCL_HUMAN	PRKCH	1.58454	0.0497012
Q96F07	CYFP2_HUMAN	CYFIP2	1.5685	0.00401218
Q8NHL6	LIRB1_HUMAN	LILRB1	1.5435	0.0314634
Q14242	SELPL_HUMAN	SELPLG	1.53904	0.0277103
Q9BPX5	ARP5L_HUMAN	ARPC5L	1.53347	0.0253435
Q99418;Q15438;O43739;Q9UIA0	CYH1_HUMAN	CYTH1	1.51976	0.0140642
Q12933	TRAF2_HUMAN	TRAF2	1.51602	0.0474423
Q9NZQ3	SPN90_HUMAN	NCKIPSD	1.50954	0.0338472
Q15052	ARHG6_HUMAN	ARHGEF6	1.50747	0.0178473
P13693;Q56UQ5	TCTP_HUMAN	TPT1	1.5022	0.0235068
P42566	EPS15_HUMAN	EPS15	1.50035	0.0266543
P55039	DRG2_HUMAN	DRG2	0.642181	0.0406456
Q8WUX1	S38A5_HUMAN	SLC38A5	0.638116	0.00741824
P46379	BAG6_HUMAN	BAG6	0.635134	0.022535
P09497	CLCB_HUMAN	CLTB	0.629841	0.0101255
Q9H3S1	SEM4A_HUMAN	SEMA4A	0.623999	0.0423562
Q6UWP8	SBSN_HUMAN	SBSN	0.607349	0.0242139
Q96AG4	LRC59_HUMAN	LRRC59	0.570121	0.00881837
Q13191	CBLB_HUMAN	CBLB	0.567031	0.00672773
Q7Z3V4	UBE3B_HUMAN	UBE3B	0.528322	0.0379183
P05186	PPBT_HUMAN	ALPL	0.524451	0.019878
Q6PCB6	AB17C_HUMAN	ABHD17C	0.480454	0.0337377
Q9HCH3	CPNE5_HUMAN	CPNE5	0.467433	0.0477061
Q52LW3	RHG29_HUMAN	ARHGAP29	0.4576	0.0253219
Q7Z3J2	VP35L_HUMAN	VPS35L	0.453818	0.0460243
Q8N271	PROM2_HUMAN	PROM2	0.410661	0.0463223
Q6YI46	TMM64_HUMAN	TMEM64	0.407032	0.00139992

## Sheet: Supplementary table 6
Supplementary table 3. Validation_CSF-EV_valid value
Columns	Log2 (intensity; Median)	Valid values
OND-11	17.2272	2845
OND-12	17.1154	2715
OND-13	17.3596	2894
OND-14	18.1664	1702
OND-15	17.9407	1913
OND01-6	17.2939	2411
OND-17	17.7728	2047
OND-18	18.014	1882
OND-19	17.4138	2369
OND-20	17.3044	2435
OND-21	17.4972	2437
OND-22	18.4891	1472
OND-23	17.3476	2564
OND-24	17.3511	2535
OND-25	17.1478	2461
OND-26	17.5007	2478
OND-27	17.0836	2762
OND-28	17.7276	2265
OND-29	17.4969	2223
OND-30	17.3345	2566
OND-31	17.3058	2500
OND-32	17.4926	2006
OND-33	17.7562	2151
OND-34	17.5408	2139
MS-11	17.5133	2324
MS-12	17.1257	2786
MS-13	17.1849	2767
MS-14	17.7382	2088
MS-15	17.7538	2118
MS-16	17.4396	2173
MS-17	17.3834	2424
MS-18	17.4595	2319
MS-19	17.9372	1913
MS-20	18.012	1897
MS-21	17.4582	2234
MS-22	17.7262	2005
MS-23	17.9679	1905
MS-24	17.7303	2231
MS-25	17.8347	2199
MS-26	17.1711	2482
MS-27	16.9436	2708
MS-28	17.4259	2401
MS-29	17.572	2312
MS-30	17.3919	2629
MS-31	17.4605	2303
MS-32	17.4081	2387
MS-33	17.4326	2542
MS-34	17.6257	2143
MS-35	17.6661	2126
MS-36	17.5153	2297
MS-37	17.3101	2334
MS-38	17.5601	2311
MS-39	17.3985	2464
MS-40	17.892	1975
MS-41	17.5564	2085
MS-42	17.3977	2528
MS-43	17.4812	2129
MS-44	17.41	2312
MS-45	17.1468	3043
MS-46	18.4771	1420
MS-47	17.1627	2719
MS-48	17.2359	2632
NMOSD-1	17.2271	2801
NMOSD-2	17.6478	2238
NMOSD-3	17.5914	2287
NMOSD-4	18.0535	1821
NMOSD-5	17.275	2355
NMOSD-6	17.5314	2296
NMOSD-7	17.501	2451
NMOSD-8	17.6836	2085
NMOSD-9	18.2106	1846
NMOSD-10	17.5831	2005
NMOSD-11	18.0409	1773
NMOSD-12	17.9242	1978
NMOSD-13	17.5878	2380
NMOSD-14	17.916	1916

## Sheet: Supplementary table 7
Supplementary table 6. Validation_CSF-EV_MS/OND
Protein.Ids	Protein.Names	Gene symbol	Fold change (MS/OND)	p-value (OND_MS)
P06312	KV401_HUMAN	IGKV4-1	7.19961	0.0480642
P11836	CD20_HUMAN	MS4A1	6.15469	2.28979e-05
P53999	TCP4_HUMAN	SUB1	4.00569	0.049556
A2NJV5	KV229_HUMAN	IGKV2-29	3.25793	0.0124
P28907	CD38_HUMAN	CD38	3.12466	0.013348
P01834	IGKC_HUMAN	IGKC	3.01542	0.0323836
P15391	CD19_HUMAN	CD19	2.78748	0.0206456
Q07955	SRSF1_HUMAN	SRSF1	2.5561	0.0192001
Q14761	PTCA_HUMAN	PTPRCAP	2.52802	0.00492336
Q96DU3	SLAF6_HUMAN	SLAMF6	2.41981	0.0106705
P26010	ITB7_HUMAN	ITGB7	2.40094	0.00564118
Q9H400	LIME1_HUMAN	LIME1	2.40066	0.00734789
P30203	CD6_HUMAN	CD6	2.31651	0.0259429
P06127	CD5_HUMAN	CD5	2.28599	0.00768464
P09693	CD3G_HUMAN	CD3G	2.24993	0.0147385
P13612	ITA4_HUMAN	ITGA4	2.22702	0.00250206
P31146	COR1A_HUMAN	CORO1A	2.22227	0.0170297
P07766	CD3E_HUMAN	CD3E	2.18247	0.00992775
P04234	CD3D_HUMAN	CD3D	2.17963	0.0156287
P01911	DRB_HUMAN	HLA-DRB1	2.15626	0.00552298
P09326	CD48_HUMAN	CD48	2.13228	0.00338111
P31994	FCG2B_HUMAN	FCGR2B	2.04859	0.00661003
O60880	SH21A_HUMAN	SH2D1A	2.02133	0.0395399
Q92608	DOCK2_HUMAN	DOCK2	1.99534	0.00682579
B0I1T2	MYO1G_HUMAN	MYO1G	1.99282	0.0196148
P32942	ICAM3_HUMAN	ICAM3	1.97358	0.0122246
Q8WWZ4	ABCAA_HUMAN	ABCA10	1.95578	0.00216202
Q13291	SLAF1_HUMAN	SLAMF1	1.93408	0.0372533
P11049	CD37_HUMAN	CD37	1.90401	0.00372917
P16150	LEUK_HUMAN	SPN	1.89641	0.0173451
P20701	ITAL_HUMAN	ITGAL	1.87564	0.0165963
P20963	CD3Z_HUMAN	CD247	1.87168	0.0223816
P08575	PTPRC_HUMAN	PTPRC	1.87101	0.00600911
P49795	RGS19_HUMAN	RGS19	1.86712	0.0138455
P15153	RAC2_HUMAN	RAC2	1.86217	0.00727473
P22001	KCNA3_HUMAN	KCNA3	1.85338	0.0131538
Q13303	KCAB2_HUMAN	KCNAB2	1.84923	0.0452386
P06239	LCK_HUMAN	LCK	1.83616	0.0215088
Q96RD9	FCRL5_HUMAN	FCRL5	1.83317	0.027201
P01730	CD4_HUMAN	CD4	1.7729	0.044666
O95466	FMNL1_HUMAN	FMNL1	1.76717	0.00731724
P01732	CD8A_HUMAN	CD8A	1.75902	0.011364
Q5JSL3	DOC11_HUMAN	DOCK11	1.75567	0.0245746
Q9Y3P8	SIT1_HUMAN	SIT1	1.75134	0.0431885
Q86YV0	RASL3_HUMAN	RASAL3	1.74856	0.0414007
P50552	VASP_HUMAN	VASP	1.74698	0.00832059
P20338	RAB4A_HUMAN	RAB4A	1.74622	0.00817267
P19397	CD53_HUMAN	CD53	1.74275	0.0056434
Q16787	LAMA3_HUMAN	LAMA3	1.73595	0.0101527
P41240	CSK_HUMAN	CSK	1.72822	0.0291301
P09486	SPRC_HUMAN	SPARC	1.71951	0.0169962
P30825	SL7A1_HUMAN	SLC7A1	1.68074	0.00273068
P29350	PTN6_HUMAN	PTPN6	1.64973	0.0215433
Q96F07	CYFP2_HUMAN	CYFIP2	1.63725	0.0036332
Q6UWD8	CP054_HUMAN	C16orf54	1.62104	0.0296985
P55160	NCKPL_HUMAN	NCKAP1L	1.56581	0.0459611
P05107	ITB2_HUMAN	ITGB2	1.54476	0.00725645
P48960	CD97_HUMAN	CD97	1.52919	0.0375868
Q30154	DRB5_HUMAN	HLA-DRB5	1.51962	0.0270863
Q8N4E7	FTMT_HUMAN	FTMT	1.502	0.0111327
Q5JR98	TC1D4_HUMAN	TCTEX1D4	0.663926	0.0409263
Q14C87	T132D_HUMAN	TMEM132D	0.662407	0.0442946
Q05193;Q9UQ16	DYN1_HUMAN	DNM1	0.652158	0.0200862
Q15738	NSDHL_HUMAN	NSDHL	0.650919	0.0134256
Q9HCU4	CELR2_HUMAN	CELSR2	0.649751	0.00768103
Q15063	POSTN_HUMAN	POSTN	0.646037	0.0400918
Q53GQ0	DHB12_HUMAN	HSD17B12	0.645226	0.0195076
P58417	NXPH1_HUMAN	NXPH1	0.644367	0.00379481
P14649;P60660	MYL6_HUMAN	MYL6	0.641731	0.0303724
P13637	AT1A3_HUMAN	ATP1A3	0.637133	0.0424638
P02743	SAMP_HUMAN	APCS	0.636042	0.0458997
Q8IZS8	CA2D3_HUMAN	CACNA2D3	0.628961	0.0315394
P14923	PLAK_HUMAN	JUP	0.6274	0.00508084
Q13423	NNTM_HUMAN	NNT	0.623402	0.0410745
Q6ZVX7	FBX50_HUMAN	NCCRP1	0.612377	0.0228756
O14880	MGST3_HUMAN	MGST3	0.612011	0.0356698
P10599	THIO_HUMAN	TXN	0.611878	0.0278933
O60477	BRNP1_HUMAN	BRINP1	0.610423	0.0177977
P33121	ACSL1_HUMAN	ACSL1	0.608791	0.0194153
O00194	RB27B_HUMAN	RAB27B	0.603528	0.0393536
Q969Z4	TR19L_HUMAN	RELT	0.602936	0.0278687
Q9Y3B3	TMED7_HUMAN	TMED7	0.602918	0.0438455
P56537	IF6_HUMAN	EIF6	0.600896	0.0127178
Q05469	LIPS_HUMAN	LIPE	0.598107	0.0156697
O00767	ACOD_HUMAN	SCD	0.594947	0.0408197
Q15811	ITSN1_HUMAN	ITSN1	0.592229	0.0371457
Q76KX8	ZN534_HUMAN	ZNF534	0.585913	0.0437859
P35754	GLRX1_HUMAN	GLRX	0.585277	0.0454051
Q8WZA0	LZIC_HUMAN	LZIC	0.582531	0.0107031
P07099	HYEP_HUMAN	EPHX1	0.580868	0.0337328
Q969G5	CAVN3_HUMAN	CAVIN3	0.580861	0.0129304
Q4V9L6	TM119_HUMAN	TMEM119	0.573456	0.0420569
Q02790	FKBP4_HUMAN	FKBP4	0.56905	0.0117905
Q9NZ01	TECR_HUMAN	TECR	0.568416	0.0432019
Q9UHY7	ENOPH_HUMAN	ENOPH1	0.563957	0.0379625
Q6NZI2	CAVN1_HUMAN	CAVIN1	0.558347	0.0300753
O76003	GLRX3_HUMAN	GLRX3	0.542762	0.0139776
Q07065	CKAP4_HUMAN	CKAP4	0.524195	0.0479436
Q8WWX9	SELM_HUMAN	SELENOM	0.503906	0.0212511
Q96JD6	AKCL2_HUMAN	AKR1E2	0.491493	0.00836031
Q9UBS5	GABR1_HUMAN	GABBR1	0.49098	0.0198149
Q9NRZ7	PLCC_HUMAN	AGPAT3	0.484672	0.00368359
Q8IXB3	TARG1_HUMAN	TRARG1	0.483218	0.0471443
O95197	RTN3_HUMAN	RTN3	0.4685	0.0483895
P09496	CLCA_HUMAN	CLTA	0.446505	0.028501
P21695	GPDA_HUMAN	GPD1	0.433656	0.0145558
Q13835	PKP1_HUMAN	PKP1	0.432051	0.0191786
Q92820	GGH_HUMAN	GGH	0.416256	0.0179009
P15924	DESP_HUMAN	DSP	0.409548	0.00635794
Q8WVV4	POF1B_HUMAN	POF1B	0.364501	0.0122439
P20930	FILA_HUMAN	FLG	0.351544	0.00926532
O95864	FADS2_HUMAN	FADS2	0.221573	0.0304202

## Sheet: Supplementary table 8
Supplementary table 4. Validation_CSF-EV_NMOSD/OND
Protein.Ids	Protein.Names	Gene symbol	Fold change (NMOSD/OND)	p-value (OND_NMOSD)
P17936	IBP3_HUMAN	IGFBP3	4.46526	0.0298477
P11836	CD20_HUMAN	MS4A1	4.37863	3.11742e-06
P07197	NFM_HUMAN	NEFM	3.68534	0.0313023
Q14315	FLNC_HUMAN	FLNC	3.58048	0.0258985
Q96DU3	SLAF6_HUMAN	SLAMF6	3.49874	0.029232
Q07955	SRSF1_HUMAN	SRSF1	3.49618	0.0246049
Q9UKZ9	PCOC2_HUMAN	PCOLCE2	3.32226	0.0461167
Q13103	SPP24_HUMAN	SPP2	3.16072	0.0234641
P54277	PMS1_HUMAN	PMS1	3.13142	0.0210403
P10451	OSTP_HUMAN	SPP1	3.11836	0.0157277
P32942	ICAM3_HUMAN	ICAM3	3.02688	0.0169644
O15335	CHAD_HUMAN	CHAD	2.90388	0.0337823
Q14761	PTCA_HUMAN	PTPRCAP	2.86234	0.0308772
A0A075B6H9	LV469_HUMAN	IGLV4-69	2.77152	0.0433126
P08493	MGP_HUMAN	MGP	2.67975	0.000820934
Q7LDG7	GRP2_HUMAN	RASGRP2	2.66808	0.0286284
P09693	CD3G_HUMAN	CD3G	2.65905	0.040253
P01714	LV319_HUMAN	IGLV3-19	2.60531	0.0256264
B0I1T2	MYO1G_HUMAN	MYO1G	2.51616	0.0170293
Q13576	IQGA2_HUMAN	IQGAP2	2.49857	0.00280671
Q86YV0	RASL3_HUMAN	RASAL3	2.48012	0.0447191
Q9Y3P8	SIT1_HUMAN	SIT1	2.46069	0.0275175
P16150	LEUK_HUMAN	SPN	2.45565	0.0198791
Q14767	LTBP2_HUMAN	LTBP2	2.45217	0.0201859
P11049	CD37_HUMAN	CD37	2.44693	0.00334458
Q14242	SELPL_HUMAN	SELPLG	2.43359	0.00763207
P07766	CD3E_HUMAN	CD3E	2.4277	0.0458037
Q8IYS5	OSCAR_HUMAN	OSCAR	2.38067	0.030261
O43586	PPIP1_HUMAN	PSTPIP1	2.37618	0.00424291
A0A075B6K4	LV310_HUMAN	IGLV3-10	2.35921	0.0369065
P13612	ITA4_HUMAN	ITGA4	2.35785	0.0173993
P49795	RGS19_HUMAN	RGS19	2.35305	0.0257638
O95498	VNN2_HUMAN	VNN2	2.33417	0.0239787
Q5JSL3	DOC11_HUMAN	DOCK11	2.32136	0.0266212
P0C671	BNIP5_HUMAN	BNIP5	2.29237	0.0016423
P21579;Q8N9I0	SYT1_HUMAN	SYT1	2.28758	0.0297485
P55160	NCKPL_HUMAN	NCKAP1L	2.27486	0.0214328
P31146	COR1A_HUMAN	CORO1A	2.27046	0.00146672
Q68DL7	CR063_HUMAN	C18orf63	2.23568	0.0297142
Q9H269	VPS16_HUMAN	VPS16	2.232	0.0203069
P15153	RAC2_HUMAN	RAC2	2.22778	0.0162777
Q8IU68	TMC8_HUMAN	TMC8	2.2099	0.0260096
P02686	MBP_HUMAN	MBP	2.19201	0.00392223
Q14956	GPNMB_HUMAN	GPNMB	2.18594	0.00263174
Q8WWZ4	ABCAA_HUMAN	ABCA10	2.18109	0.0173803
P05062	ALDOB_HUMAN	ALDOB	2.17496	0.0451167
Q6UWD8	CP054_HUMAN	C16orf54	2.17408	0.0124091
P17927	CR1_HUMAN	CR1	2.16229	0.0122519
Q13303	KCAB2_HUMAN	KCNAB2	2.1353	0.0450669
P62266	RS23_HUMAN	RPS23	2.11765	0.000302951
P62318	SMD3_HUMAN	SNRPD3	2.11283	0.0402613
P56705	WNT4_HUMAN	WNT4	2.11216	0.0154033
Q9Y6R7	FCGBP_HUMAN	FCGBP	2.09436	0.045003
Q92608	DOCK2_HUMAN	DOCK2	2.09045	0.0465435
P08575	PTPRC_HUMAN	PTPRC	2.08033	0.0398377
P19397	CD53_HUMAN	CD53	2.04565	0.0100191
Q15743	OGR1_HUMAN	GPR68	2.00822	0.049196
O00400	ACATN_HUMAN	SLC33A1	1.98427	0.0457684
P60201	MYPR_HUMAN	PLP1	1.96826	0.000166215
Q9Y4F9	RIPR2_HUMAN	RIPOR2	1.9619	0.0478709
Q8NEB9	PK3C3_HUMAN	PIK3C3	1.96186	0.0111512
Q9BXX0	EMIL2_HUMAN	EMILIN2	1.94376	0.0113805
P50552	VASP_HUMAN	VASP	1.94354	0.0181213
Q96F07	CYFP2_HUMAN	CYFIP2	1.94251	0.0428775
P46776	RL27A_HUMAN	RPL27A	1.94162	0.015092
O95466	FMNL1_HUMAN	FMNL1	1.92221	0.0284797
Q9Y275	TN13B_HUMAN	TNFSF13B	1.89053	0.0490853
Q15437	SC23B_HUMAN	SEC23B	1.87101	0.043011
P01732	CD8A_HUMAN	CD8A	1.86621	0.0453587
Q7Z403	TMC6_HUMAN	TMC6	1.86476	0.0194507
P36222	CH3L1_HUMAN	CHI3L1	1.86012	0.0315256
P29350	PTN6_HUMAN	PTPN6	1.83486	0.012134
P21730	C5AR1_HUMAN	C5AR1	1.83004	0.000327391
P13521	SCG2_HUMAN	SCG2	1.82556	0.0404213
P02787	TRFE_HUMAN	TF	1.82242	0.0397024
O95477	ABCA1_HUMAN	ABCA1	1.80911	0.0401127
P02749	APOH_HUMAN	APOH	1.79433	0.0494128
Q9NZ45	CISD1_HUMAN	CISD1	1.79202	0.0386298
Q86UX7	URP2_HUMAN	FERMT3	1.78373	0.014156
P28062	PSB8_HUMAN	PSMB8	1.78051	0.0181555
P0CG04;P0CF74;P0DOY3;P0DOX8;B9A064;P0DOY2;A0M8Q6	IGLC7_HUMAN	IGLC7	1.77982	0.0318199
Q8N4A0	GALT4_HUMAN	GALNT4	1.77586	0.00472669
Q6GTX8	LAIR1_HUMAN	LAIR1	1.76504	0.0136512
P11597	CETP_HUMAN	CETP	1.76002	0.0295569
Q30201	HFE_HUMAN	HFE	1.75323	0.0258787
P25445	TNR6_HUMAN	FAS	1.75314	0.0194409
Q16787	LAMA3_HUMAN	LAMA3	1.75222	0.0439287
P01911	DRB_HUMAN	HLA-DRB1	1.74624	0.0419222
Q9Y262	EIF3L_HUMAN	EIF3L	1.74139	0.00454765
P52566	GDIR2_HUMAN	ARHGDIB	1.74093	0.0203003
P08648	ITA5_HUMAN	ITGA5	1.73364	0.000420317
O60603	TLR2_HUMAN	TLR2	1.73292	0.00569156
A0A075B6Q5	HV364_HUMAN	IGHV3-64	1.72979	0.0154156
P01893	HLAH_HUMAN	HLA-H	1.72288	0.0380798
P07196	NFL_HUMAN	NEFL	1.71023	0.00990713
P43490	NAMPT_HUMAN	NAMPT	1.69741	0.0294667
P31994	FCG2B_HUMAN	FCGR2B	1.67805	0.0467592
Q13813	SPTN1_HUMAN	SPTAN1	1.67681	0.0146671
Q9NQ90	ANO2_HUMAN	ANO2	1.66703	0.00101337
Q9Y653	AGRG1_HUMAN	ADGRG1	1.65476	0.0413395
P51659	DHB4_HUMAN	HSD17B4	1.6522	0.0261276
P61225	RAP2B_HUMAN	RAP2B	1.64372	0.00274169
Q9Y678	COPG1_HUMAN	COPG1	1.64052	0.00785569
P05388;Q8NHW5	RLA0_HUMAN	RPLP0	1.63871	0.0434999
P55083	MFAP4_HUMAN	MFAP4	1.63249	0.0221601
Q8N4C8	MINK1_HUMAN	MINK1	1.62917	0.0376587
O95674	CDS2_HUMAN	CDS2	1.62698	0.0359577
P06753	TPM3_HUMAN	TPM3	1.62513	0.049101
Q9NZK5	ADA2_HUMAN	ADA2	1.62316	0.0116699
Q9H4E7	DEFI6_HUMAN	DEF6	1.61861	0.0494343
P08319;P00325	ADH1B_HUMAN	ADH1B	1.6144	0.0212474
P01721	LV657_HUMAN	IGLV6-57	1.6003	0.00620656
Q9NWV4	CZIB_HUMAN	CZIB	1.59467	0.0154591
Q14644	RASA3_HUMAN	RASA3	1.59	0.0214685
Q05655	KPCD_HUMAN	PRKCD	1.58702	0.00707955
Q9Y624	JAM1_HUMAN	F11R	1.58688	0.0485294
P05107	ITB2_HUMAN	ITGB2	1.5868	0.030258
P63302	SELW_HUMAN	SELENOW	1.58495	0.0219917
Q9GZV7	HPLN2_HUMAN	HAPLN2	1.58335	0.0377757
O15143	ARC1B_HUMAN	ARPC1B	1.57683	0.0310244
O76096	CYTF_HUMAN	CST7	1.57375	0.0448547
Q13530	SERC3_HUMAN	SERINC3	1.5698	0.0295864
O15427	MOT4_HUMAN	SLC16A3	1.56822	0.00590189
P20042	IF2B_HUMAN	EIF2S2	1.56799	0.00952032
Q8N386	LRC25_HUMAN	LRRC25	1.56778	0.0288308
P02461	CO3A1_HUMAN	COL3A1	1.56529	0.021787
P04632	CPNS1_HUMAN	CAPNS1	1.5625	0.0445552
P63098	CANB1_HUMAN	PPP3R1	1.56226	0.0420193
Q9Y6U3	ADSV_HUMAN	SCIN	1.55765	0.0134714
P23396	RS3_HUMAN	RPS3	1.54987	0.0288304
Q14667	K0100_HUMAN	KIAA0100	1.54883	0.00764269
P30825	SL7A1_HUMAN	SLC7A1	1.54675	0.0448574
O15511	ARPC5_HUMAN	ARPC5	1.54651	0.0135848
P15309	PPAP_HUMAN	ACP3	1.54257	0.0312239
P16389	KCNA2_HUMAN	KCNA2	1.53815	0.0244126
Q9Y6X5;Q6UWV6	ENPP4_HUMAN	ENPP4	1.53437	0.043032
Q03405	UPAR_HUMAN	PLAUR	1.52955	0.0219137
P14384	CBPM_HUMAN	CPM	1.52512	0.0381581
P40121	CAPG_HUMAN	CAPG	1.52342	0.0225709
P34096	RNAS4_HUMAN	RNASE4	1.52225	0.0360525
P12956	XRCC6_HUMAN	XRCC6	1.5202	0.0364416
P61160	ARP2_HUMAN	ACTR2	1.5192	0.0101805
P52306	GDS1_HUMAN	RAP1GDS1	1.51347	0.0169977
Q5QJ74	TBCEL_HUMAN	TBCEL	1.50881	0.00542376
P52788	SPSY_HUMAN	SMS	1.5027	0.00304502
P12318	FCG2A_HUMAN	FCGR2A	1.50166	0.0257671
P51512	MMP16_HUMAN	MMP16	1.50036	0.0310389
Q06203	PUR1_HUMAN	PPAT	0.665859	0.0424918
O75970	MPDZ_HUMAN	MPDZ	0.66571	0.0196741
Q5HYW2	NHSL2_HUMAN	NHSL2	0.664708	0.0351032
Q9NWM3	CUED1_HUMAN	CUEDC1	0.664117	0.021732
Q7Z4L5	TT21B_HUMAN	TTC21B	0.663953	0.0200231
O60503	ADCY9_HUMAN	ADCY9	0.663867	0.0132913
Q8IUW5	RELL1_HUMAN	RELL1	0.662852	0.0400675
Q9HCM3	K1549_HUMAN	KIAA1549	0.660819	0.0260331
P78356	PI42B_HUMAN	PIP4K2B	0.659669	0.0314793
O43306	ADCY6_HUMAN	ADCY6	0.657061	0.0151467
Q9P2H3	IFT80_HUMAN	IFT80	0.65623	0.0306078
Q9UM54	MYO6_HUMAN	MYO6	0.656065	0.0230039
Q9UG01	IF172_HUMAN	IFT172	0.655236	0.0334095
Q9NZQ3	SPN90_HUMAN	NCKIPSD	0.652984	0.0064063
Q8NEZ3	WDR19_HUMAN	WDR19	0.652453	0.0213321
P55011	S12A2_HUMAN	SLC12A2	0.651977	0.008004
Q96AJ1	CLUA1_HUMAN	CLUAP1	0.65018	0.0455804
P57739	CLD2_HUMAN	CLDN2	0.64915	0.0192237
Q969L2	MAL2_HUMAN	MAL2	0.646357	0.0149113
Q8NI35	INADL_HUMAN	PATJ	0.645179	0.0168923
Q8NFJ9	BBS1_HUMAN	BBS1	0.644339	0.0393833
Q13099	IFT88_HUMAN	IFT88	0.643592	0.0345599
Q5T0F9	C2D1B_HUMAN	CC2D1B	0.642906	0.0394917
Q8TAF3	WDR48_HUMAN	WDR48	0.642535	0.0265739
Q8WVS4	WDR60_HUMAN	WDR60	0.642018	0.0389767
A0AVF1	IFT56_HUMAN	TTC26	0.641564	0.0167536
Q7L5Y1	ENOF1_HUMAN	ENOSF1	0.641413	0.0403887
P08913	ADA2A_HUMAN	ADRA2A	0.639878	0.0187652
Q9UPZ9	CILK1_HUMAN	CILK1	0.633416	0.0377279
Q86WT1	TT30A_HUMAN	TTC30A	0.629966	0.0227647
Q9Y496	KIF3A_HUMAN	KIF3A	0.628079	0.02487
Q92845	KIFA3_HUMAN	KIFAP3	0.623732	0.022694
P10721	KIT_HUMAN	KIT	0.623139	0.0170137
Q9NRR6	INP5E_HUMAN	INPP5E	0.623028	0.00941247
Q9HCU4	CELR2_HUMAN	CELSR2	0.623001	0.0492682
Q8WYA0	IFT81_HUMAN	IFT81	0.622182	0.0224868
Q8NCM8	DYHC2_HUMAN	DYNC2H1	0.620764	0.030113
Q9NQ48	LZTL1_HUMAN	LZTFL1	0.61747	0.00598838
Q96LB3	IFT74_HUMAN	IFT74	0.616644	0.0178499
Q5TFE4	NT5D1_HUMAN	NT5DC1	0.615465	0.00699011
Q9NSC5	HOME3_HUMAN	HOMER3	0.614682	0.0158956
O75581	LRP6_HUMAN	LRP6	0.613378	0.018158
Q9UPX8	SHAN2_HUMAN	SHANK2	0.599952	0.00547301
Q9H0F7	ARL6_HUMAN	ARL6	0.599434	0.00565955
Q9BXJ3	C1QT4_HUMAN	C1QTNF4	0.598569	0.0420248
Q92599	SEPT8_HUMAN	SEPTIN8	0.598092	0.0094703
Q9NQS3	NECT3_HUMAN	NECTIN3	0.59513	0.0100878
O00487	PSDE_HUMAN	PSMD14	0.59114	0.0402767
Q9BZF9	UACA_HUMAN	UACA	0.587203	0.0448734
O60303	K0556_HUMAN	KIAA0556	0.58141	0.0193092
Q6ZVL6	K154L_HUMAN	KIAA1549L	0.575474	0.000495656
Q71H61	ILDR2_HUMAN	ILDR2	0.575215	0.00668383
Q7Z5B4	RIC3_HUMAN	RIC3	0.573113	0.0125295
Q1MSJ5	CSPP1_HUMAN	CSPP1	0.572811	0.035647
Q53HC0	CCD92_HUMAN	CCDC92	0.572703	0.0161289
Q9P206	K1522_HUMAN	KIAA1522	0.570319	0.0395268
Q9H7X7	IFT22_HUMAN	IFT22	0.566607	0.0329235
P55036;A2A3N6	PSMD4_HUMAN	PSMD4	0.560734	0.00400343
O43490	PROM1_HUMAN	PROM1	0.558673	0.0116342
O60266	ADCY3_HUMAN	ADCY3	0.552995	0.00164417
P20794	MAK_HUMAN	MAK	0.551959	0.0174597
O43237	DC1L2_HUMAN	DYNC1LI2	0.551077	0.0127249
Q9NSB8	HOME2_HUMAN	HOMER2	0.550236	0.01513
Q5MY95	ENTP8_HUMAN	ENTPD8	0.546532	0.0352431
A8MQ11	PM2P5_HUMAN	PMS2P5	0.541644	0.0417291
Q01973	ROR1_HUMAN	ROR1	0.536349	0.00187503
P55087	AQP4_HUMAN	AQP4	0.526692	0.0216178
O00757	F16P2_HUMAN	FBP2	0.52411	0.00570259
Q15389	ANGP1_HUMAN	ANGPT1	0.518573	0.0338276
Q8NEU8	DP13B_HUMAN	APPL2	0.518098	0.000531139
Q9NVM1	EVA1B_HUMAN	EVA1B	0.518003	0.00340662
Q9UQB3	CTND2_HUMAN	CTNND2	0.513092	0.0233733
A8MVW0	F1712_HUMAN	FAM171A2	0.507083	0.000130504
Q9H3S7	PTN23_HUMAN	PTPN23	0.506966	0.000383791
Q6NS38	ALKB2_HUMAN	ALKBH2	0.487141	0.00355457
P98082	DAB2_HUMAN	DAB2	0.482659	0.00527747
O95069	KCNK2_HUMAN	KCNK2	0.446908	0.00279811
Q15811	ITSN1_HUMAN	ITSN1	0.429568	0.0192351
O15123	ANGP2_HUMAN	ANGPT2	0.41581	0.00912946
Q86YM7	HOME1_HUMAN	HOMER1	0.396768	0.00275099
O15213	WDR46_HUMAN	WDR46	0.39199	0.0410023
Q9UHY7	ENOPH_HUMAN	ENOPH1	0.365762	0.042186
P46091	GPR1_HUMAN	GPR1	0.117891	0.0160954
